# Supplementary material
Source: HighWire-hosted journal article supplement (https://jnm.snmjournals.org/highwire/filestream/94479/field_highwire_adjunct_files/0/119768_Supplemental_Data.pdf)
Supplement: 119768_Supplemental_Data.pdf [file 119768_Supplemental_Data.pdf]

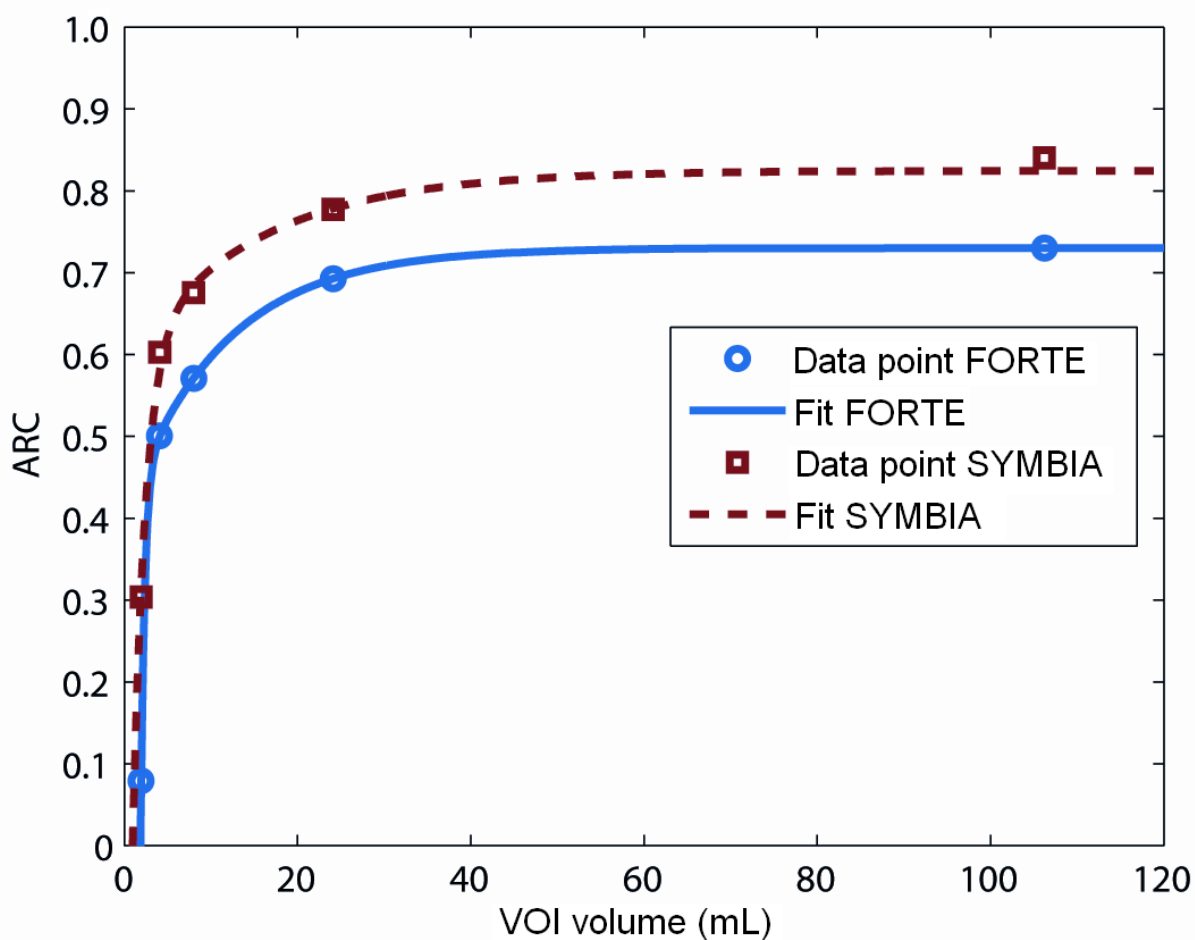

**Supplemental Figure 1.** Activity recovery curves for the 2 used SPECT systems (Symbia and Forte). The activity recovery coefficient (ARC) per volume of interest (VOI) increases with the volume of the VOI.

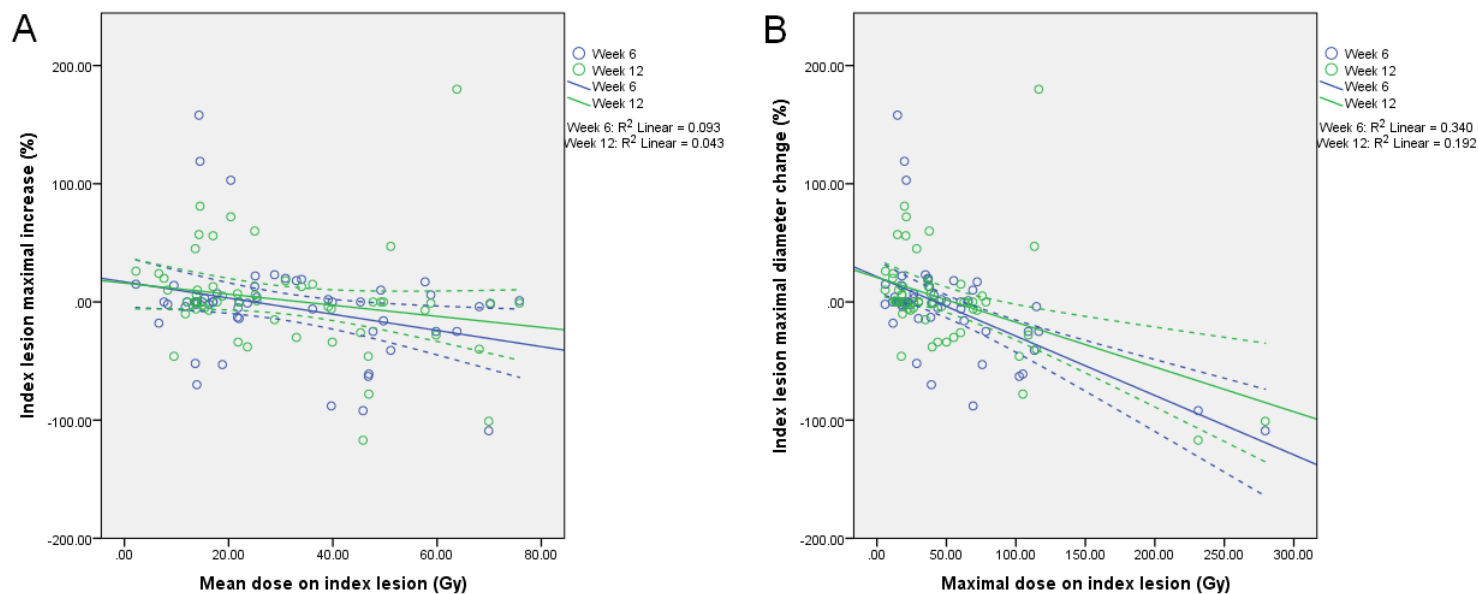

**Supplemental Figure 2.** Dose response analysis. The mean (A) and maximal (B) dose on all index lesions (up to 5 per patient) was plotted against the change in maximal diameter of the index lesions at 6-wk and 12-wk follow-up. Maximal diameters were measured on CT according to RECIST 1.1, and dose was measured with SPECT. There is a weak correlation between dose and change in tumor diameter.
